# Supplementary material for: Spatial Ecology of an Arboreal Iguana (Oplurus cyclurus) in a Treeless Landscape
Source: MDPI journal article supplement (doi:10.3390/ani13203198), 2023-10-13
Supplement: s1 [file s1]

## Article

# Spatial Ecology of an Arboreal Iguana (*Oplurus cyclurus*) in a Treeless Landscape

Fulvio Licata, Paolo Eusebio Bergò, Devin Edmonds, Franco Andreone and Gonçalo M. Rosa

## Supplementary Materials

**Table S1.** Radio-tracked individuals of *Oplurus cyclurus* in Isalo Massif (central-southern Madagascar).

**Table S2.** List of Generalized and Linear Mixed models explaining the activity status, the basking behaviour and the burrow use of *Oplurus cyclurus* in Isalo Massif (central-southern Madagascar).

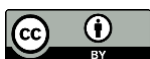

**Copyright:** © 2023 by the authors. Submitted for possible open access publication under the terms and conditions of the Creative Commons Attribution (CC BY) license (<https://creativecommons.org/licenses/by/4.0/>).

**Table S1.** Radio-tracked individuals of *Oplurus cyclurus* in Isalo Massif (central-southern Madagascar). The asterisk indicates the home range estimated for individual #011 which has been calculated using Kernel Density Estimator, while between parenthesis is reported the 100% Minimum Convex Polygon. TL and TaL indicate the total length and tail length of the individual (in mm), respectively. Life stages: A and J refer to adult and juvenile, respectively.

| ID  | Tracking period (days) | n observations | Life stage | TL    | TaL   | Time between observations (hours) | n burrows used | n burrow changes | n re-used burrows | Distance between burrows (m) | Basking distance (m)     | Isopleth 75% (m <sup>2</sup> ) | Isopleth 95% (m <sup>2</sup> ) | Isopleth 99% (m <sup>2</sup> ) |
|-----|------------------------|----------------|------------|-------|-------|-----------------------------------|----------------|------------------|-------------------|------------------------------|--------------------------|--------------------------------|--------------------------------|--------------------------------|
| 001 | 31                     | 46             | A          | -     | -     | 16.2 ± 17.9 (0.8–75.5)            | 3              | 5                | 2                 | 12.18 ± 0.31 (12.04–12.73)   | 0.20 ± 0.71 (0.05–4.1)   | 76.35                          | 391.06                         | 1520.74                        |
| 002 | 23                     | 25             | A          | 162   | 91    | 22.3 ± 15.7 (1–73.9)              | 3              | 5                | 2                 | 7.99 ± 5.30 (4.12–14)        | 2.39 ± 6.76 (0.05–24.5)  | 32.99                          | 227.87                         | 862.85                         |
| 003 | 22                     | 25             | A          | 134   | 64    | 21.3 ± 20.2 (0.9–96.6)            | 5              | 4                | -                 | 9.70 ± 4.61 (6–14.87)        | 2.81 ± 4.98 (0.05–13.8)  | 74.39                          | 201.65                         | 373.45                         |
| 004 | 22                     | 26             | A          | 152.8 | 72.8  | 20.4 ± 16.6 (0.9–75.7)            | 2              | 1                | -                 | 79.16                        | 0.52 ± 0.80 (0.05–3.14)  | 15.28                          | 762.13                         | 4650.71                        |
| 005 | 21                     | 22             | A          | 145   | 59    | 23.3 ± 16.7 (0.4–74.1)            | 4              | 4                | 1                 | 17.70 ± 2.78 (13.60–19.42)   | 2.05 ± 4.58 (0.05–13.25) | 145.89                         | 585.82                         | 1764.41                        |
| 006 | 8                      | 13             | A          | 165.5 | 76.3  | 13.9 ± 14.5 (1–44.9)              | 1              | -                | -                 | -                            | 0.45 ± 0.80 (0.05–2.5)   | 6.65                           | 14.95                          | 35.96                          |
| 007 | 4                      | 2              | J          | 76.2  | 43.5  | 72                                | 1              | -                | -                 | -                            | 5.05 ± 6.72 (0.3–9.8)    | -                              | -                              | -                              |
| 008 | 7                      | 6              | A          | -     | -     | 28.4 ± 50.9 (0.6–118.3)           | 1              | -                | -                 | -                            | 0.47 ± 0.60 (0.05–1.15)  | -                              | -                              | -                              |
| 009 | 2                      | 2              | J          | 80    | 43.65 | 23.90                             | 1              | -                | -                 | -                            | 0.05                     | -                              | -                              | -                              |
| 010 | 8                      | 5              | A          | -     | -     | 41.6 ± 53.3 (0.5–120)             | 1              | -                | -                 | -                            | 0.06 ± 0.03 (0.05–0.1)   | -                              | -                              | -                              |
| 011 | 15                     | 14             | A          | 172.1 | 96.9  | 26.3 ± 18.8 (0.0–74.7)            | 6              | 7                | 2                 | 11.90 ± 4.71 (4.47–17.03)    | 1.80 ± 1.98 (0.05–4.7)   | 315.26*                        | 602.79*                        | 851.12 (98.50)*                |
| 012 | 14                     | 15             | J          | 69.8  | 21    | 22.9 ± 18.3 (0.8–74.2)            | 1              | -                | -                 | -                            | 1.92 ± 3.26 (0.05–9.7)   | 7.40                           | 17.89                          | 38.87                          |
| 013 | 1                      | 2              | A          | -     | -     | 0.70                              | 1              | -                | -                 | -                            | 0.30 ± 0.35 (0.05–0.55)  | -                              | -                              | -                              |
| 014 | 10                     | 10             | A          | 173   | 89    | 24.8 ± 5.5 (14.9–33.0)            | 1              | -                | -                 | -                            | 0.12 ± 0.08 (0.05–0.2)   | 5.28                           | 17.59                          | 43.27                          |
| 015 | 8                      | 8              | A          | 143.5 | 79    | 25.3 ± 6.3 (15.3–32.8)            | 1              | -                | -                 | -                            | 0.39 ± 0.51 (0.05–1.12)  | 3.98                           | 11.71                          | 39.45                          |
| 016 | 4                      | 4              | A          | -     | -     | 26.9 ± 4.8 (23.3–32.3)            | 1              | -                | -                 | -                            | 0.40 ± 0.14 (0.3–0.5)    | -                              | -                              | -                              |
| 017 | 1                      | 1              | J          | 86    | 45    | -                                 | 1              | -                | -                 | -                            | 0.05                     | -                              | -                              | -                              |
| 018 | 4                      | 4              | A          | -     | -     | 26.5 ± 4.9 (23.4–32.1)            | 1              | -                | -                 | -                            | 0.45 ± 0.57 (0.05–0.85)  | -                              | -                              | -                              |
| 019 | 4                      | 4              | A          | -     | -     | 26.4 ± 5 (23.1–32.2)              | 1              | -                | -                 | -                            | 0.36                     | -                              | -                              | -                              |

**Table S2.** List of Generalized and Linear Mixed models explaining the activity status, the basking behaviour and the burrow use of *Oplurus cyclurus* in Isalo Massif (central-southern Madagascar). The table shows the number of parameters estimated in the model (K), AIC<sub>c</sub> score of the model, AIC<sub>c</sub> difference with the best model ( $\Delta\text{AIC}_c$ ), the relative weight of the model with respect to the candidate set of models (AIC<sub>c</sub> wt), variation explained by the fixed effects ( $R^2_M$  = marginal  $R^2$ ) or by both fixed and random effects of the model ( $R^2_C$  = conditional  $R^2$ ). Models which had a simpler nested model with lower AIC<sub>c</sub> were removed. In the best models (underlined), significant variables are highlighted in bold. Time = minutes from sunrise; Stage = ontogenetic stage (adult vs. juvenile); Cloud coverage = cloud coverage (no clouds, partially cloudy, cloudy); Temperature = temperature at 1.2 m above the ground.

| Response                                                              | K | AIC <sub>c</sub> | $\Delta\text{AIC}_c$ | AIC <sub>c</sub> wt | $R^2_M$ | $R^2_C$ |
|-----------------------------------------------------------------------|---|------------------|----------------------|---------------------|---------|---------|
| Independent variables                                                 |   |                  |                      |                     |         |         |
| <b>Activity status</b>                                                |   |                  |                      |                     |         |         |
| <u>Time + Time<sup>2</sup> + Stage + Cloud coverage + Temperature</u> | 8 | 145.82           | 0.00                 | 0.73                | 0.55    | 0.56    |
| Time + Time <sup>2</sup> + Stage + Cloud coverage                     | 7 | 149.48           | 3.67                 | 0.12                | 0.55    | 0.55    |
| Stage + Cloud coverage + Temperature                                  | 6 | 150.58           | 4.76                 | 0.07                | 0.41    | 0.43    |
| Time + Time <sup>2</sup> + Cloud coverage + Temperature               | 7 | 150.99           | 5.17                 | 0.05                | 0.41    | 0.46    |
| Time + Time <sup>2</sup> + Stage + Temperature                        | 6 | 153.51           | 7.70                 | 0.02                | 0.52    | 0.52    |
| Cloud coverage + Temperature                                          | 5 | 154.70           | 8.88                 | 0.01                | 0.32    | 0.38    |
| [...]                                                                 |   |                  |                      |                     |         |         |
| Null model                                                            | 2 | 187.40           | 37.92                | <0.001              | –       | –       |
| <b>Basking distance</b>                                               |   |                  |                      |                     |         |         |
| <u>Time + Time<sup>2</sup></u>                                        | 5 | 279.75           | 0.00                 | 0.98                | 0.08    | 0.09    |
| Null model                                                            | 3 | 287.99           | 8.24                 | 0.02                | –       | –       |
| <b>Burrow choice (depth burrow)</b>                                   |   |                  |                      |                     |         |         |
| Null model                                                            | 3 | 46.50            | –                    | –                   | –       | –       |
| <b>Burrow choice (width burrow)</b>                                   |   |                  |                      |                     |         |         |
| Null model                                                            | 3 | 14.80            | –                    | –                   | –       | –       |
